# Supplementary material for: Early relapse after autologous transplant for myeloma is associated with poor survival regardless of cytogenetic risk
Source: PubMed Central journal article supplement — Haematologica. 2020 Sep 1;105(9):e480–3. doi: 10.3324/haematol.2019.236588 (PMC7556617; doi:10.3324/haematol.2019.236588), 2020-09-01
Supplement: 2019_236588_CORRE_SUPPL.pdf [file 2019_236588_CORRE_SUPPL.pdf]

**Early relapse after autologous transplant for myeloma is associated with poor survival regardless of cytogenetic risk**

Jill Corre,<sup>1,2\*</sup> Lydia Montes,<sup>3\*</sup> Elodie Martin,<sup>4</sup> Aurore Perrot,<sup>5</sup> Denis Caillot,<sup>6</sup> Xavier Leleu,<sup>7</sup> Karim Belhadj,<sup>8</sup> Thierry Facon,<sup>9</sup> Cyrille Hulin,<sup>10</sup> Mohamad Mohty,<sup>11</sup> Jean Fontan,<sup>12</sup> Margaret Macro,<sup>13</sup> Sabine Brechignac,<sup>14</sup> Arnaud Jaccard,<sup>15</sup> Anne-Marie Stoppa,<sup>16</sup> Frederique Orsini-Pio-celle,<sup>17</sup> Didier Adiko,<sup>18</sup> Laurent Voillat,<sup>19</sup> Faiza Keddar,<sup>20</sup> Marly Barry,<sup>21</sup> Helene Demarquette,<sup>22</sup> Marie-Noelle Certain,<sup>23</sup> Isabelle Plantier,<sup>24</sup> Murielle Roussel,<sup>25</sup> Benjamin Hébraud,<sup>25</sup> Thomas Filleron,<sup>4</sup> Michel Attal<sup>2,25</sup> and Hervé Avet-Loiseau<sup>1,2</sup>

\*JC and LM contributed equally as co-first authors

<sup>1</sup>Unit for Genomics in Myeloma, Institut Universitaire du Cancer de Toulouse-Onco-pole, University Hospital, Toulouse; <sup>2</sup>Centre de Recherche en Cancérologie de Toulouse, Institut National de la Santé et de la Recherche Médicale U1037, Toulouse; <sup>3</sup>Hematology Department, University Hospital, Amiens; <sup>4</sup>Biostatistics Department, Institut Claudius Regaud, IUCT-O, Toulouse; <sup>5</sup>Hematology Department, University Hospital, Nancy; <sup>6</sup>Hematology Department, University Hospital, Dijon; <sup>7</sup>Hematology Department, University Hospital, Poitiers; <sup>8</sup>Hematology Department, University Hospital, Créteil; <sup>9</sup>Hematology Department, University Hospital, Lille; <sup>10</sup>Hematology Department, University Hospital, Bordeaux; <sup>11</sup>Hematology Department, University Hospital, Paris; <sup>12</sup>Hematology Department, University Hospital, Besançon; <sup>13</sup>Hematology Department, University Hospital, Caen; <sup>14</sup>Hematology Department, University Hospital, Bobigny; <sup>15</sup>Hematology Department, University Hospital, Limoges; <sup>16</sup>Hematology Department, Institut Paoli Calmettes, Marseille; <sup>17</sup>Hematology Department, Department Hospital, Annecy; <sup>18</sup>Hematology Department, Department Hospital, Libourne; <sup>19</sup>Hematology Department, Department Hospital, Chalon-sur-Saône; <sup>20</sup>Hematology Department, Department Hospital, Valenciennes; <sup>21</sup>Hematology Department, Department Hospital, Boulogne-Sur-Mer; <sup>22</sup>Hematology Department, Department Hospital, Dunkerque; <sup>23</sup>Hematology Department, Department Hospital, Mâcon; <sup>24</sup>Hematology Department, Department Hospital, Roubaix and <sup>25</sup>Hematology Department, Institut Universitaire du Cancer de Toulouse-Onco-pole, University Hospital, Toulouse, France

Correspondence: JILL CORRE [corre.jill@iuct-oncopole.fr](mailto:corre.jill@iuct-oncopole.fr)

doi:10.3324/haematol.2019.236588

**Supplemental Table 1: Univariable analysis of overall survival (landmark analysis at 18 months)**

|                              | Death / N  | Hazard Ratio [IC95%] |                      |
|------------------------------|------------|----------------------|----------------------|
| Sex :                        |            |                      | p = 0.0976           |
| Male                         | 309 / 1396 | 1.00                 |                      |
| Female                       | 207 / 1025 | 0.86 [ 0.72; 1.03]   |                      |
| Age :                        |            |                      | <b>p = 0.0055</b>    |
| <60y                         | 284 / 1405 | 1.00                 |                      |
| >=60y                        | 235 / 1069 | 1.28 [ 1.07; 1.52]   |                      |
| ISS :                        |            |                      | <b>p &lt; 0.0001</b> |
| 1                            | 91 / 690   | 1.00                 |                      |
| 2                            | 194 / 882  | 1.76 [ 1.37; 2.26]   |                      |
| 3                            | 153 / 481  | 2.39 [ 1.84; 3.09]   |                      |
| Del 17p and/or t4;14) :      |            |                      | <b>p &lt; 0.0001</b> |
| No                           | 319 / 1782 | 1.00                 |                      |
| Yes                          | 141 / 359  | 2.63 [ 2.16; 3.21]   |                      |
| Early relapse (<18 months) : |            |                      | <b>p &lt; 0.0001</b> |
| No                           | 327 / 2131 | 1.00                 |                      |
| Yes                          | 192 / 343  | 5.96 [ 4.98; 7.14]   |                      |
| Maintenance :                |            |                      | p = 0.2298           |
| No                           | 467 / 2179 | 1.00                 |                      |
| Yes                          | 52 / 295   | 0.84 [ 0.63; 1.12]   |                      |
| Best response:               |            |                      | <b>p = 0.0036</b>    |
| VGPR/CR                      | 222 / 1224 | 1.00                 |                      |
| SD/RP                        | 94 / 299   | 1.43 [ 1.12; 1.82]   |                      |
| Treatment :                  |            |                      | <b>p = 0.0002</b>    |
| Triplet                      | 198 / 1552 | 1.00                 |                      |
| Doublet                      | 321 / 922  | 1.41 [ 1.17; 1.69]   |                      |

**Supplemental Table 2: Multivariable analysis of overall survival (landmark analysis at 18 months)**

| (n=1178, 255 events)       | Hazard Ratio | IC95%         | p value           |
|----------------------------|--------------|---------------|-------------------|
| ISS                        |              |               |                   |
| 1                          | 1.00         |               |                   |
| 2                          | 1.72         | [1.24; 2.38]  | <b>0.0012</b>     |
| 3                          | 1.89         | [1.33; 2.68]  | <b>0.0003</b>     |
| Early relapse (<18 months) |              |               |                   |
| No                         | 1.00         |               |                   |
| Yes                        | 4.40         | [3.34; 5.81]  | <b>&lt;0.0001</b> |
| del17p &/ or t(4;14)       |              |               |                   |
| No                         | 1.00         |               |                   |
| Yes                        | 2.05         | [1.54; 2.72]  | <b>&lt;0.0001</b> |
| Best response              |              |               |                   |
| VGPR/CR                    | 1.00         |               |                   |
| SD/RP                      | 1.15         | [0.86; 1.54]  | 0.3470            |
| Treatment                  |              |               |                   |
| Triplet                    | 1.00         |               |                   |
| Doublet                    | 1.54         | [ 1.18; 2.00] | <b>0.0015</b>     |

**Supplemental Table 3: Description of patients' cytogenetic factors and their association to early relapse**

|                                                               | No relapse within 18m<br>N = 2131 | Early relapse ( $\leq 18m$ )<br>N = 496 | p value              |
|---------------------------------------------------------------|-----------------------------------|-----------------------------------------|----------------------|
| <b>Del(17p) and/or t(4;14) (n = 2273)</b>                     |                                   |                                         | <b>p &lt; 0.0001</b> |
| No                                                            | 1560 (85.3%)                      | 300 (67.4%)                             |                      |
| Yes                                                           | 268 (14.7%)                       | 145 (32.6%)                             |                      |
| Missing                                                       | 303                               | 51                                      |                      |
| <b>Trisomy 5 (n = 830)</b>                                    |                                   |                                         | <b>p = 0.0024</b>    |
| No                                                            | 363 (57.8%)                       | 141 (69.8%)                             |                      |
| Yes                                                           | 265 (42.2%)                       | 61 (30.2%)                              |                      |
| Missing                                                       | 1503                              | 294                                     |                      |
| <b>Gain 1q (n = 840)</b>                                      |                                   |                                         | <b>p &lt; 0.0001</b> |
| No                                                            | 420 (66.2%)                       | 99 (48.1%)                              |                      |
| Yes                                                           | 214 (33.8%)                       | 107 (51.9%)                             |                      |
| Missing                                                       | 1497                              | 290                                     |                      |
| <b>Del(1p32) (n = 820)</b>                                    |                                   |                                         | <b>p = 0.0007</b>    |
| No                                                            | 558 (90.6%)                       | 167 (81.9%)                             |                      |
| Yes                                                           | 58 (9.4%)                         | 37 (18.1%)                              |                      |
| Missing                                                       | 1515                              | 292                                     |                      |
| <b>Del(17p) or t(4;14) or gain 1q or del(1p32) (n = 1061)</b> |                                   |                                         | <b>p &lt; 0.0001</b> |
| No                                                            | 330 (41.9%)                       | 57 (20.9%)                              |                      |
| Yes                                                           | 458 (58.1%)                       | 216 (79.1%)                             |                      |
| Missing                                                       | 1343                              | 223                                     |                      |

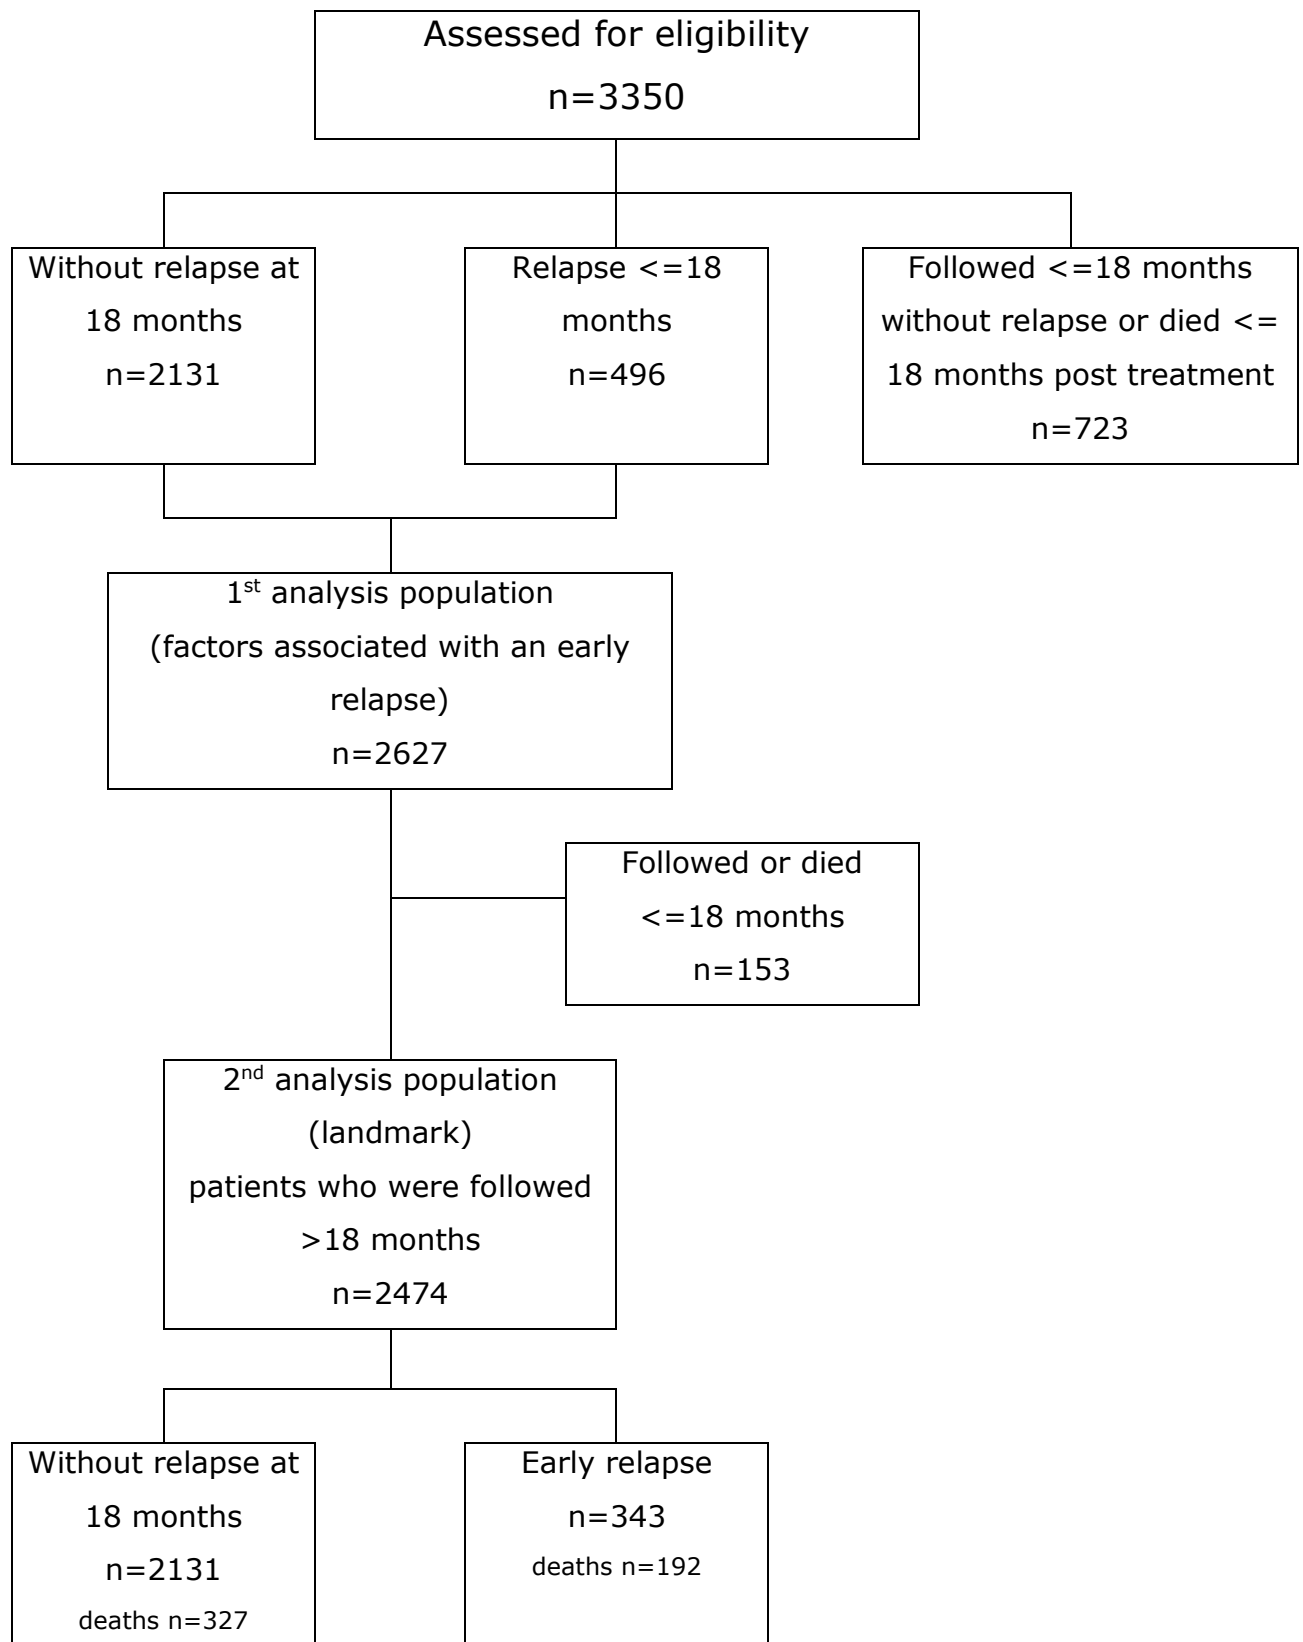

**Supplemental Figure 1: Data flowchart.** The flowchart illustrates the selection process of patient data for statistical and model analyses.

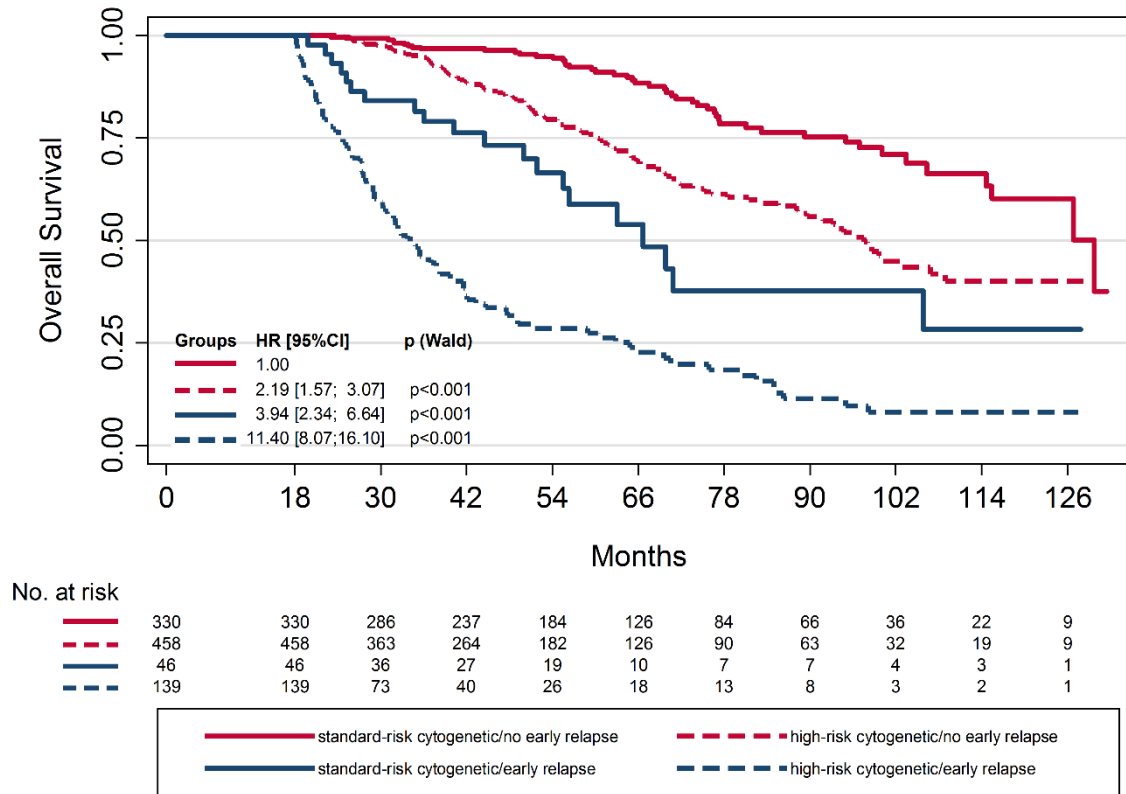

**Supplemental Figure 2: Kaplan-Meier overall survival curves for patients according to early or no early relapse.** Landmark analysis at 18 months. Patients with no early relapse and standard-risk cytogenetic (N=330, red line) vs patients with no early relapse and high-risk cytogenetic (N=458, red dashed line) vs patients with early relapse and standard-risk cytogenetic (N=46, blue line) vs patients with early relapse and high-risk cytogenetic (N=139, blue dashed line). High-risk cytogenetic was defined here by the presence of t(4;14) and/or del(17p) in more than 55% of plasma cells and/or del(1p32) and/or gain 1q.
